# Supplementary material for: Pregnant Users’ Perceptions of the Birth Plan Interface in the “My Prenatal Care” App: Observational Validation Study
Source: PubMed Central journal article supplement (PMC6458531; doi:10.2196/11374), 2019-03-28
Supplement: formative_v3i1e11374_app1.pdf [file formative_v3i1e11374_app1.pdf]

## Appendix A

### Questionnaire on users' characterization

#### I - Demographics

- 1-Identification number: \_\_\_\_\_
- 2-Your age (in years): \_\_\_\_\_
- 3- Ethnicity self-declaration:  white  brown  black  indigenous  yellow
- 4-Religion: \_\_\_\_\_
- 5-Education degree: \_\_\_\_\_
- 6-Origin: \_\_\_\_\_
- 7-Gestational age, based on the last menstrual period or ultrasonography (weeks): \_\_\_\_\_
- 8-Marital status:  married-cohabitant  single  other \_\_\_\_\_
- 9- Occupation: \_\_\_\_\_

#### II- Health history

- 1-How many births have you had?  none  1  2  3  4
- 2-If you already had, how was your experience?  positive / good  negative / bad  neither positive nor negative
- 3-Have you performed any Birth Plan before?  Yes  No
- 3.1- If yes, how was your experience in carrying out the Birth Plan?  
\_\_\_\_\_

#### III- Technology experience

- 1-Do you own a cell phone?  Yes  No
- 1.2 - If yes, which its operating system:  IOS  Android
- 2-Do you have Internet accessible on your cell phone?  yes  no
- 3-Which application do you most access on your cellphone?  none  Whatsapp  Facebook  Instagram  Games  other: \_\_\_\_\_
- 4-What is your daily cellphone usage time, considering average?  less than 1 h  between 1 and 3 hs  between 3 and 5 h  more than 5 h
- 5-Have ever used any health-related application?  Yes  No
- 5.1-iiIf yes, which ones? \_\_\_\_\_
