# Supplementary material for: Pregnant Users’ Perceptions of the Birth Plan Interface in the “My Prenatal Care” App: Observational Validation Study
Source: PubMed Central journal article supplement (PMC6458531; doi:10.2196/11374), 2019-03-28
Supplement: formative_v3i1e11374_app3.pdf [file formative_v3i1e11374_app3.pdf]

## User experience test survey

Now, we want to know about your experience during the Birth-Plan preparation application. You can express suggestions for improvements

1-What were the issues you had the most difficulty to execution:

- My ability to handle applications in general
- Regarding how the content was exposed in this application
- My ability to handle cell phones in general
- I had no difficulties, considering the way I performed the tasks
- Other opinion: \_\_\_\_\_

2-Do you have any suggestion to improve the Birth Plan in this application? ( ) Yes ( ) No.  
If yes, please describe your suggestions: \_\_\_\_\_

3- Now, Please describe your experience or opinion when using the Birthing Plan in an application: \_\_\_\_\_

We thank you for your cooperation!
