# Supplementary material for: Pregnant Users’ Perceptions of the Birth Plan Interface in the “My Prenatal Care” App: Observational Validation Study
Source: PubMed Central journal article supplement (PMC6458531; doi:10.2196/11374), 2019-03-28
Supplement: formative_v3i1e11374_app4.pdf [file formative_v3i1e11374_app4.pdf]

## Qualitative analysis of the perceptions of users

Spontaneous phrases of the users about their experience and their opinion about the BP-prototype-interface. Original Portuguese' version with the English' translation:

1. "**Ótimo. A mulher deveria de fato ter *autonomia* em escolher anestesia**"  
"**Great. The woman should have *autonomy* in choosing anesthesia**" (P1)
2. "**Muito bom, aprendi coisas que não sabia com o aplicativo**"  
"**Very good, I *learned* things I did not know with the application**" (P2)
3. "**Achei legal e interessante**"  
"**It was *cool and interesting***" (P3)
4. "**Muito bom este aplicativo, ajuda a melhorar nossa assistência**"  
"**Very good this app, it helps to improve our assistance**" (P4)
5. "**Gostei do aplicativo, porque você tem *possibilidade de falar o que deseja***" "I liked the application because you have the **ability to express what you want**" (P5)
6. "**Gostei do aplicativo, muito interessante**"  
"**I liked the application, *very interesting***" (P6)
7. "**Gostei, achei ótimo, vai ser muito bom para quem utiliza. Tendo o aplicativo ajuda muito, será excelente. Muito fácil de usar**"  
"**I liked it, I think it's *great*, it's going to be *very good* for those who use it. Having the app **helps a lot**, it will be great. *Very easy to use*" (P7)**
8. "**Achei interessante, gostei**"  
"**It was *interesting*, I liked it**" (P8)
9. "**Muito interessante, uma forma de colocar sua vontade, de se expressar**" "**Very interesting, a way of putting our desires, *expressing myself***" (P9)
10. "**Bom para gestante *acompanhar*, ficar mais *tranquila* nessa fase que não temos tanto *conhecimento***"  
"**Good for pregnant women to *accompany*, to be *calmer* at this stage that we do not have so much *knowledge***" (P10)
11. "**Rápido, prático, e sem dúvida, a melhor funcionalidade é poder compartilhá-lo. Não adianta a informação ficar só comigo**"  
"**Quick, practical, and without a doubt, the best functionality is to *be able to* share it. It's not good letting the information only stay with me**" (P11)
